# Supplementary material
Source: HighWire-hosted journal article supplement (https://bmjopen.bmj.com/content/11/10/e050765)
Supplement: inline-supplementary-material-1 [file inline-supplementary-material-1.pdf]

| <b>Daily Structured Assessment (not initial)</b>                                                                                                                                                                                                                                                                                                                                                                                                                                                                                                                                                                                                                                                                                                                                                                                                                                                                                                                                                                                                                                                                                                                                                                                                                                                                                                                                                                                                                                                                                                                                                                                                                                                                                                                                                           |
|------------------------------------------------------------------------------------------------------------------------------------------------------------------------------------------------------------------------------------------------------------------------------------------------------------------------------------------------------------------------------------------------------------------------------------------------------------------------------------------------------------------------------------------------------------------------------------------------------------------------------------------------------------------------------------------------------------------------------------------------------------------------------------------------------------------------------------------------------------------------------------------------------------------------------------------------------------------------------------------------------------------------------------------------------------------------------------------------------------------------------------------------------------------------------------------------------------------------------------------------------------------------------------------------------------------------------------------------------------------------------------------------------------------------------------------------------------------------------------------------------------------------------------------------------------------------------------------------------------------------------------------------------------------------------------------------------------------------------------------------------------------------------------------------------------|
| <p>Electronic Medical Record Review</p> <p>Administration of intervention:</p> <ul style="list-style-type: none"> <li>- Review if administered successfully, review nursing notes regarding administration, tolerability and side effects.</li> </ul> <p>Review glycaemic control.</p> <p>Review nursing and medical notes*:</p> <ul style="list-style-type: none"> <li>- Evidence of fluctuating levels of consciousness and behaviour, disturbed sleep cycle, perceptual changes including hallucinations.</li> <li>- Evidence of hospital acquired complications.</li> <li>- New prescription of antipsychotics or benzodiazepines.</li> </ul>                                                                                                                                                                                                                                                                                                                                                                                                                                                                                                                                                                                                                                                                                                                                                                                                                                                                                                                                                                                                                                                                                                                                                          |
| <p>Informant history from patient's family and health care workers where available.</p>                                                                                                                                                                                                                                                                                                                                                                                                                                                                                                                                                                                                                                                                                                                                                                                                                                                                                                                                                                                                                                                                                                                                                                                                                                                                                                                                                                                                                                                                                                                                                                                                                                                                                                                    |
| <p>Patient review</p> <p>General observations*:</p> <ul style="list-style-type: none"> <li>- Alertness, level of consciousness, motor activity, hallucinations.</li> </ul> <p>Trial related questions:</p> <ul style="list-style-type: none"> <li>- Does the patient recall receiving the intervention? Side effects? Nasal irritation? Trial related issues?</li> </ul> <p>Orientation and thought content:</p> <ul style="list-style-type: none"> <li>- Assess orientation* to: date of birth, current year, place, age, day of week, month.</li> <li>- Is the patient aware of the reason for hospitalisation? Duration of hospital admission?</li> <li>- If required consider specific questions to assess disorganised thinking# (Does a stone float on water? Are there fish in the sea? Do you hit a nail with a hammer?)</li> </ul> <p>Registration*:</p> <ul style="list-style-type: none"> <li>- Three-word registration (rotating words daily to avoid learning bias)</li> </ul> <p>Attention:</p> <ul style="list-style-type: none"> <li>- Ability to participate in conversation and shift attention.</li> <li>- Five letter word backwards* (rotating single syllable words daily to avoid learning bias)</li> <li>- Months of the year backwards (&lt;7 months)</li> <li>- Supplementary tests as required#: SAVEAHAART (≥2 errors), days of the week backwards (≥1 errors), five-digit span forwards(≥1 errors), three-digit span backwards(≥1 errors).</li> </ul> <p>Recall*</p> <p>Assessment of perceptual abnormalities:</p> <ul style="list-style-type: none"> <li>- Have you seen and experienced anything unusual or unexpected*?</li> <li>- Other questions: Do you feel safe? Do you think anyone is out to harm you? Are you being well looked after in the hospital?</li> </ul> |
| <p>Complete short and long form confusion assessment method and delirium index.</p> <ul style="list-style-type: none"> <li>- If the patient is negative on the short form confusion assessment for two consecutive days cease the trial.</li> </ul>                                                                                                                                                                                                                                                                                                                                                                                                                                                                                                                                                                                                                                                                                                                                                                                                                                                                                                                                                                                                                                                                                                                                                                                                                                                                                                                                                                                                                                                                                                                                                        |

\*Required for delirium index/long-form confusion assessment method

#Consider for patients with delirium superimposed on dementia

^Consider if lower education, learning bias suspected
